# Supplementary material for: Prognostic value of plasma B-type natriuretic peptide levels after exercise in patients with severe asymptomatic aortic stenosis
Source: HighWire-hosted journal article supplement (doi:10.1136/heartjnl-2014-305729), 2014-07-03
Supplement: heartjnl-2014-305729supp.pdf [file heartjnl-2014-305729supp.pdf]

# Online Supplementary Materials

## for the following *Heart* article

**TITLE:** Prognostic Value of Plasma B-Type Natriuretic Peptide Levels After Exercise in Patients with Severe Asymptomatic Aortic Stenosis

**AUTHORS:** Romain Capoulade\*, PhD<sup>1</sup>, Julien Magne\*, PhD<sup>2</sup>, Raluca Dulgheru, MD<sup>2</sup>, Zeineb Hachicha, MD<sup>1</sup>, Jean G. Dumesnil, MD, FRCPC, FACC<sup>1</sup>, Kim O'Connor, MD<sup>1</sup>, Marie Arsenault, MD<sup>1</sup>, Sébastien Bergeron, MD<sup>1</sup>, Luc A. Pierard, MD<sup>2</sup>, Patrizio Lancellotti, MD<sup>2</sup>, Philippe Pibarot, DVM, PhD, FACC, FAHA, FESC<sup>1</sup>.

<sup>1</sup> Institut Universitaire de Cardiologie et de Pneumologie de Québec / Québec Heart & Lung Institute, Laval University, Québec city, Québec, Canada.

<sup>2</sup> University of Liège Hospital, GIGA Cardiovascular Sciences, Heart Valve Clinic, Department of Cardiology, CHU Sart Tilman, Liège, Belgium.

\*Both authors have equally contributed to the paper

## SUPPLEMENTARY FIGURE LEGENDS

**SUPPLEMENTARY FIGURE S1:** Comparison of the event-free survival curves for tertiles of peak-exercise BNP level and tertiles of delta BNP levels in the whole cohort (n=211).

**Caption:** This figure shows the event-free survival curves for the composite end-point of death or aortic valve replacement according to tertiles of peak exercise BNP level (Panel A) and tertiles of delta BNP levels (Panel B) in the whole cohort (n=211). The symbols indicate the significant differences between groups: \* p<0.05 versus “Tertile1”; ¶ p<0.05 versus “Tertile2”. The numbers at the bottom of the graph represent the number of patients at risk at each follow-up year. The p value is that of the log-rank test.

**SUPPLEMENTARY FIGURE S2:** Comparison of the event-free survival curves for median peak-exercise BNP level in the subsets of patients with high and low resting BNP level in the whole cohort (n=211).

**Caption:** This figure shows the event-free survival curves in the whole cohort (n=211) for the composite end-point of death or aortic valve replacement in the subset of patients with low vs. high resting BNP level (full vs. dotted lines, respectively), according to low vs. high peak-exercise BNP (red vs. blue curves, respectively). The symbols indicate the significant difference between groups: \* p<0.05 versus “Low resting – Low peak-exercise BNP level”; ¶ p<0.05 versus “Low resting – High peak-exercise BNP level”; § p<0.05 versus “High resting – Low peak-exercise BNP level”. The numbers at the bottom of the graph represent the number of patients at risk at each follow-up year. The p value is that of the log-rank test.

**SUPPLEMENTARY TABLE S1: Impact of BNP Level on Event-Free Survival in the Whole Cohort (n=211)**

|                                                                                 | Individual               |         | Multivariate Models #1   |         | Multivariate Models #2   |         |
|---------------------------------------------------------------------------------|--------------------------|---------|--------------------------|---------|--------------------------|---------|
|                                                                                 | HR<br>(95% CI)           | p value | HR<br>(95% CI)           | p value | HR<br>(95% CI)           | p value |
| <b>Resting BNP level</b>                                                        |                          |         |                          |         |                          |         |
| <i>Resting BNP level<br/>(per 100 pg/ml increase)</i>                           | <b>1.6</b><br>(1.3-1.9)  | <0.0001 | <b>1.4</b><br>(1.1-1.7)  | 0.004   | –                        | –       |
| <b>Peak-exercise BNP level</b>                                                  |                          |         |                          |         |                          |         |
| <i>Peak-exercise BNP level<br/>(per 100 pg/ml increase)</i>                     | <b>1.6</b><br>(1.4-1.8)  | <0.0001 | <b>1.4</b><br>(1.2-1.6)  | <0.0001 | –                        | –       |
| <b>Tertiles of peak-exercise BNP level</b>                                      |                          |         |                          |         |                          |         |
| <i>Tertile 1<br/>(6 to 42 pg/ml)</i>                                            | <b>1.0</b><br>(referent) | –       | <b>1.0</b><br>(referent) | –       | <b>1.0</b><br>(referent) | –       |
| <i>Tertile 2<br/>(43 to 92 pg/ml)</i>                                           | <b>2.6</b><br>(1.5-4.7)  | 0.0007  | <b>2.3</b><br>(1.3-4.4)  | 0.005   | <b>2.3</b><br>(1.3-4.3)  | 0.007   |
| <i>Tertile 3<br/>(92 to 956 pg/ml)</i>                                          | <b>5.9</b><br>(3.5-10.5) | <0.0001 | <b>4.8</b><br>(2.7-9.0)  | <0.0001 | <b>4.5</b><br>(2.3-9.0)  | <0.0001 |
| <i>Resting BNP level<br/>(per 100 pg/ml increase)</i>                           | <b>1.6</b><br>(1.3-1.9)  | <0.0001 | –                        | –       | <b>1.1</b><br>(0.8-1.4)  | 0.63    |
| <b>Delta of BNP levels</b>                                                      |                          |         |                          |         |                          |         |
| <i>Absolute difference of BNP levels<br/>(per 100 pg/ml increase from rest)</i> | <b>3.4</b><br>(2.5-4.7)  | <0.0001 | –                        | –       | <b>2.7</b><br>(1.7-4.1)  | <0.0001 |
| <i>Resting BNP level<br/>(per 100 pg/ml increase)</i>                           | <b>1.6</b><br>(1.3-1.9)  | <0.0001 | –                        | –       | <b>1.1</b><br>(0.8-1.3)  | 0.69    |

| <b>Tertiles of delta BNP levels</b>                  |                          |         |                          |         |                          |         |
|------------------------------------------------------|--------------------------|---------|--------------------------|---------|--------------------------|---------|
| <i>Tertile 1</i><br>(-54 to 3)                       | <b>1.0</b><br>(referent) | –       | <b>1.0</b><br>(referent) | –       | <b>1.0</b><br>(referent) | –       |
| <i>Tertile 2</i><br>(4 to 19)                        | <b>2.7</b><br>(1.5-5.1)  | 0.0009  | <b>2.7</b><br>(1.4-5.6)  | 0.002   | <b>2.7</b><br>(1.4-5.5)  | 0.002   |
| <i>Tertile 3</i><br>(19 to 337)                      | <b>6.4</b><br>(3.6-12.1) | <0.0001 | <b>5.9</b><br>(3.1-12.1) | <0.0001 | <b>5.3</b><br>(2.7-11.0) | <0.0001 |
| <i>Resting BNP level</i><br>(per 100 pg/ml increase) | <b>1.6</b><br>(1.3-1.9)  | <0.0001 | –                        | –       | <b>1.2</b><br>(0.9-1.5)  | 0.10    |

**Legend:** BNP: B-type natriuretic peptides; HR: hazard ratio; CI: confidence interval. Models #1 included age, gender, mean transvalvular gradient, valvulo-arterial impedance, indexed left atrial area, and exercise-induced increase in heart rate, mean transvalvular gradient, and valvulo-arterial impedance; Models #2 were Models #1 plus resting BNP level.

**SUPPLEMENTARY TABLE S2:** Impact of tertiles of resting BNP Level on Event-Free Survival in Severe AS patients (n=157; 74%)

|                                                      | Individual               |         | Multivariate Model #1    |         | Multivariate Model #2    |         |
|------------------------------------------------------|--------------------------|---------|--------------------------|---------|--------------------------|---------|
|                                                      | HR<br>(95% CI)           | p value | HR<br>(95% CI)           | p value | HR<br>(95% CI)           | p value |
| <b>Tertiles of resting BNP level</b>                 |                          |         |                          |         |                          |         |
| <i>Tertile 1</i><br>(4 to 35 pg/ml)                  | <b>1.0</b><br>(referent) | –       | <b>1.0</b><br>(referent) | –       | <b>1.0</b><br>(referent) | –       |
| <i>Tertile 2</i><br>(36 to 67 pg/ml)                 | <b>1.8</b><br>(1.0-3.3)  | 0.06    | <b>1.8</b><br>(0.9-3.4)  | 0.08    | <b>1.6</b><br>(0.8-3.0)  | 0.16    |
| <i>Tertile 3</i><br>(68 to 843 pg/ml)                | <b>3.7</b><br>(2.1-6.6)  | <0.0001 | <b>3.0</b><br>(1.6-6.0)  | 0.001   | <b>2.0</b><br>(1.0-4.2)  | 0.06    |
| <i>Peak-ex BNP level</i><br>(per 100 pg/ml increase) | <b>1.5</b><br>(1.4-1.7)  | <0.0001 | –                        | –       | <b>1.4</b><br>(1.1-1.6)  | 0.002   |

**Legend:** BNP: B-type natriuretic peptides; HR: hazard ratio; CI: confidence interval. Model #1 included age, gender, mean transvalvular gradient, valvulo-arterial impedance, indexed left atrial area, and exercise-induced increase in heart rate, mean transvalvular gradient, and valvulo-arterial impedance; Model #2 was Model #1 plus resting BNP level.

**SUPPLEMENTARY TABLE S3:** Reclassification of Patients with Severe AS (n=157) for 1-Year Events using Model with Peak-Ex BNP in a 2-Category Net Reclassification Improvement Analysis

|                                                     |           | Model with established risk factors and peak-ex BNP |           |
|-----------------------------------------------------|-----------|-----------------------------------------------------|-----------|
|                                                     |           | <28% Risk                                           | ≥28% Risk |
| <b>Participants with events at 1 year (n=42)</b>    |           |                                                     |           |
| Model with established risk factors                 | <28% Risk | 10                                                  | 4         |
|                                                     | ≥28% Risk | 4                                                   | 24        |
| <b>Participants without events at 1 year (n=92)</b> |           |                                                     |           |
| Model with established risk factors                 | <28% Risk | 60                                                  | 1         |
|                                                     | ≥28% Risk | 17                                                  | 14        |

**Legend:** BNP: B-type natriuretic peptides; peak-ex: peak-exercise; NRI: net reclassification improvement. Established risk factors included age, gender, mean transvalvular gradient, valvulo-arterial impedance, indexed left atrial area, and exercise-induced changes in heart rate, mean transvalvular gradient and valvulo-arterial impedance.

**SUPPLEMENTARY TABLE S4:** Reclassification of Patients with Severe AS (n=157) for 1-Year Events using Model with Peak-Ex BNP in a 3-Category Net Reclassification Improvement Analysis

|                                                     |             | Model with established risk factors and peak-ex BNP |             |           |
|-----------------------------------------------------|-------------|-----------------------------------------------------|-------------|-----------|
|                                                     |             | <19% Risk                                           | 19-35% Risk | ≥35% Risk |
| <b>Participants with events at 1 year (n=42)</b>    |             |                                                     |             |           |
| Model with established risk factors                 | <19% Risk   | 6                                                   | 0           | 1         |
|                                                     | 19-35% Risk | 0                                                   | 5           | 5         |
|                                                     | ≥35% Risk   | 1                                                   | 5           | 19        |
| <b>Participants without events at 1 year (n=92)</b> |             |                                                     |             |           |
| Model with established risk factors                 | <19% Risk   | 31                                                  | 6           | 0         |
|                                                     | 19-35% Risk | 19                                                  | 15          | 1         |
|                                                     | ≥35% Risk   | 1                                                   | 10          | 9         |

**Legend:** BNP: B-type natriuretic peptides; peak-ex: peak-exercise; NRI: net reclassification improvement. Established risk factors included age, gender, mean transvalvular gradient, valvulo-arterial impedance, indexed left atrial area, and exercise-induced changes in heart rate, mean transvalvular gradient, and valvulo-arterial impedance.

**SUPPLEMENTARY TABLE S5:** Impact of the best cut-point values for resting and peak-ex BNP Levels on Event-Free Survival in Patients with Severe AS (n=157)

|                                                        | Individual              |         | Multivariate Model      |         |
|--------------------------------------------------------|-------------------------|---------|-------------------------|---------|
|                                                        | HR<br>(95% CI)          | p value | HR<br>(95% CI)          | p value |
| <b>Best cut-point values</b>                           |                         |         |                         |         |
| <i>Resting BNP level</i><br><i>&gt; 58 pg/ml</i>       | <b>3.0</b><br>(1.9-4.7) | <0.0001 | <b>1.1</b><br>(0.4-2.7) | 0.86    |
| <i>Peak-exercise BNP level</i><br><i>&gt; 86 pg/ml</i> | <b>4.1</b><br>(2.6-6.5) | <0.0001 | <b>3.5</b><br>(1.3-9.2) | 0.01    |

**Legend:** BNP: B-type natriuretic peptides; HR: hazard ratio; CI: confidence interval. Multivariate model included age, gender, mean transvalvular gradient, valvulo-arterial impedance, indexed left atrial area, and exercise-induced increase in heart rate, mean transvalvular gradient, and valvulo-arterial impedance.



SUPPLEMENTARY FIGURE S1

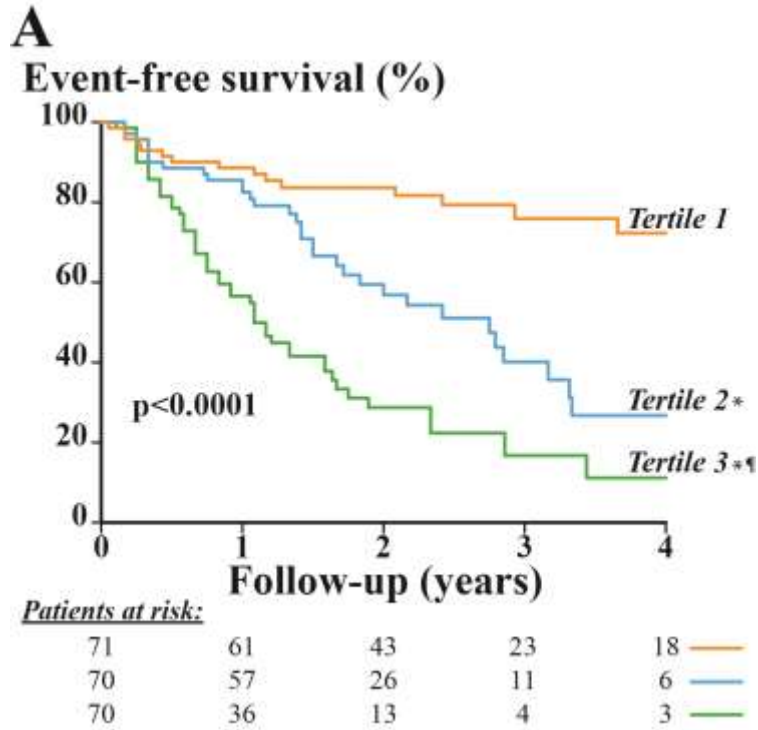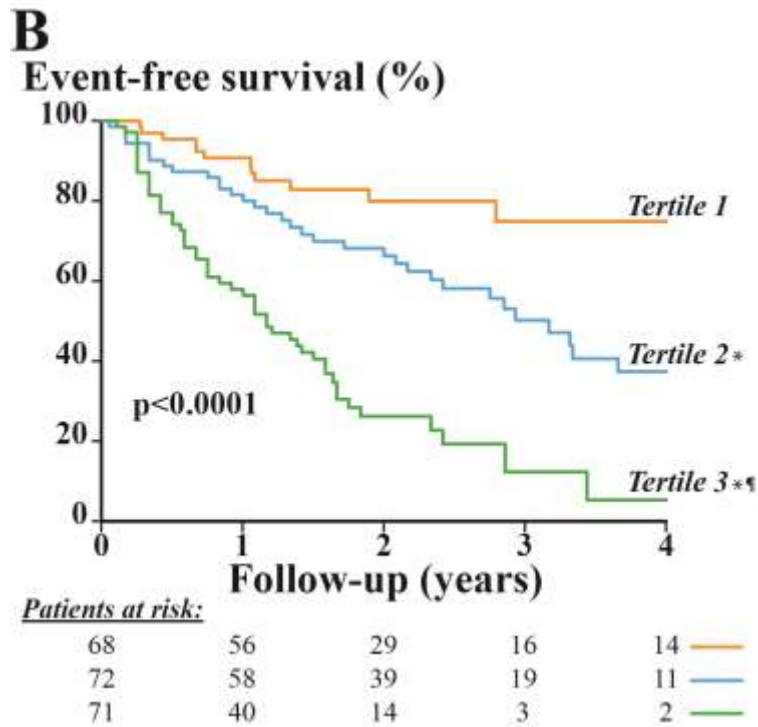

SUPPLEMENTARY FIGURE S2

**Event-free survival (%)**

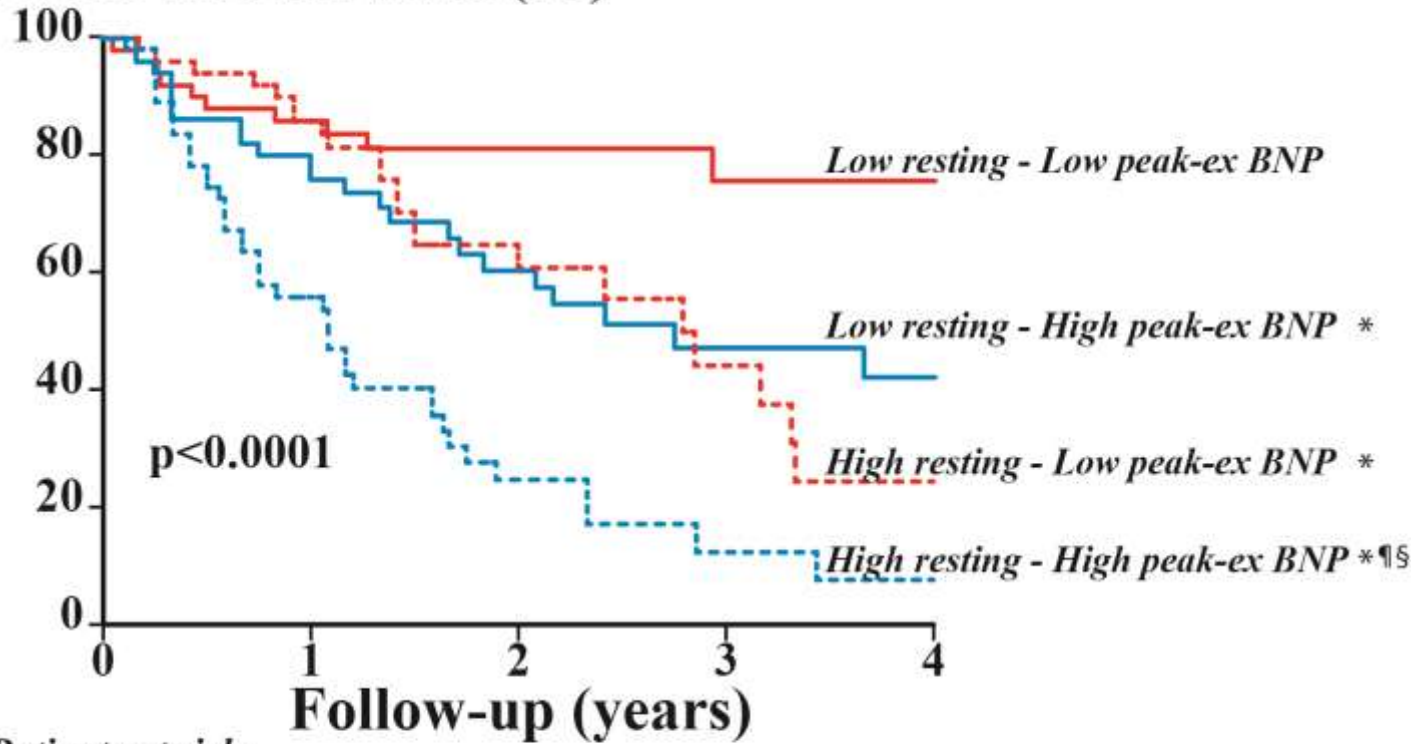

Patients at risk:

|    |    |    |    |    |       |
|----|----|----|----|----|-------|
| 52 | 42 | 30 | 14 | 12 | —     |
| 52 | 40 | 23 | 11 | 7  | —     |
| 51 | 44 | 19 | 9  | 5  | - - - |
| 56 | 28 | 10 | 4  | 3  | - - - |
